# Supplementary material
Source: PubMed Central journal article supplement (PMC4491998)
Supplement: embj0034-1385-sd1.pdf [file embj0034-1385-sd1.pdf]

## Supplementary material

### Figure S1.

#### Interaction between UBL5 and FANCI

- A.** List of selected proteins with high SILAC (H/L) ratios identified in mass spectrometry (MS)-based analysis of UBL5-interacting proteins, as described previously<sup>1</sup>. HeLa cells transfected with Strep-HA-UBL5 plasmid or empty vector were cultured in heavy (H) or light (L) SILAC medium, respectively. Cell lysates were incubated with Strep-Tactin Sepharose. Bound complexes were washed extensively and analyzed by MS.
- B.** Whole cell extracts (WCE) of U2OS cells transfected with cDNA encoding GFP-FANCI were subjected to GFP immunoprecipitation followed by immunoblotting with SART1 and GFP antibodies.
- C.** U2OS cells transfected with cDNA encoding Strep-HA-tagged UBL5 were treated or not with 1  $\mu$ M mitomycin C (MMC) for 18 h. Whole cell extracts (WCE) were subjected to Strep-Tactin pull-down followed by immunoblotting with FANCI and HA antibodies. \*, non-specific band.

**A**

| Protein symbol | SILAC ratio (H/L) |
|----------------|-------------------|
| SART1          | 9.21              |
| *UBL5          | 7.28              |
| MFAP1          | 5.87              |
| WBP11          | 4.79              |
| NPW38          | 3.76              |
| PRPF38A        | 3.70              |
| <b>FANCI</b>   | <b>3.09</b>       |
| EFTUD2         | 2.97              |
| SNRPD1         | 2.75              |
| PRPF8          | 2.69              |
| SNRPD3         | 2.66              |

**B**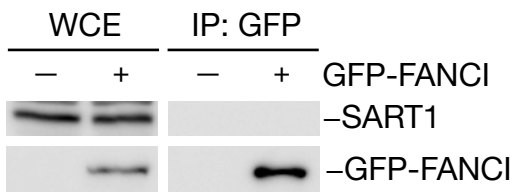**C**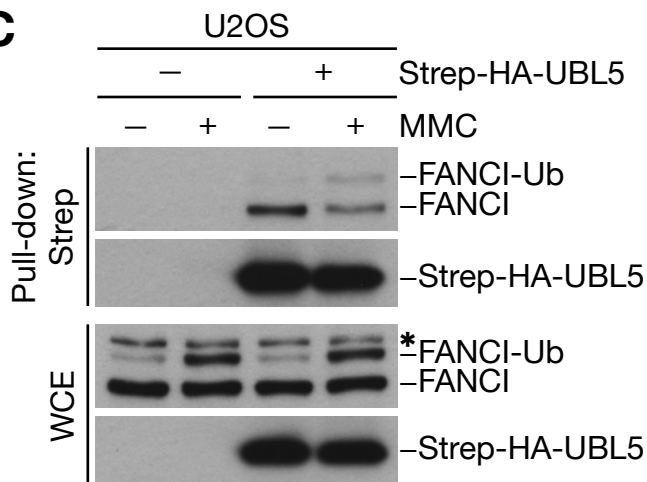

**Figure S2.**

**UBL5 is required for the integrity of the FA pathway**

- A.** Extracts of HeLa cells transfected with UBL5 siRNAs were analyzed by immunoblotting with indicated antibodies.
- B.** Extracts of HeLa cells transfected with non-targeting (CTRL) or FANCI siRNAs were analyzed by immunoblotting with indicated antibodies.
- C.** U2OS cells were transfected with non-targeting control (CTRL) or UBL5 siRNA, subsequently transfected with a construct encoding HA-FANCI and then treated with 0.2  $\mu$ M MMC for 24 h. Cells were fixed and immunostained with HA antibody. Representative images are shown. Arrows indicate cells transiently expressing HA-FANCI. Scale bar, 10  $\mu$ m. For quantification, 200 cells were counted in each experiment. Mean values ( $\pm$ SD) from three independent experiments are shown.
- D.** Extracts of U2OS cells transfected with indicated siRNAs were analyzed by immunoblotting. See also Fig. 2F.

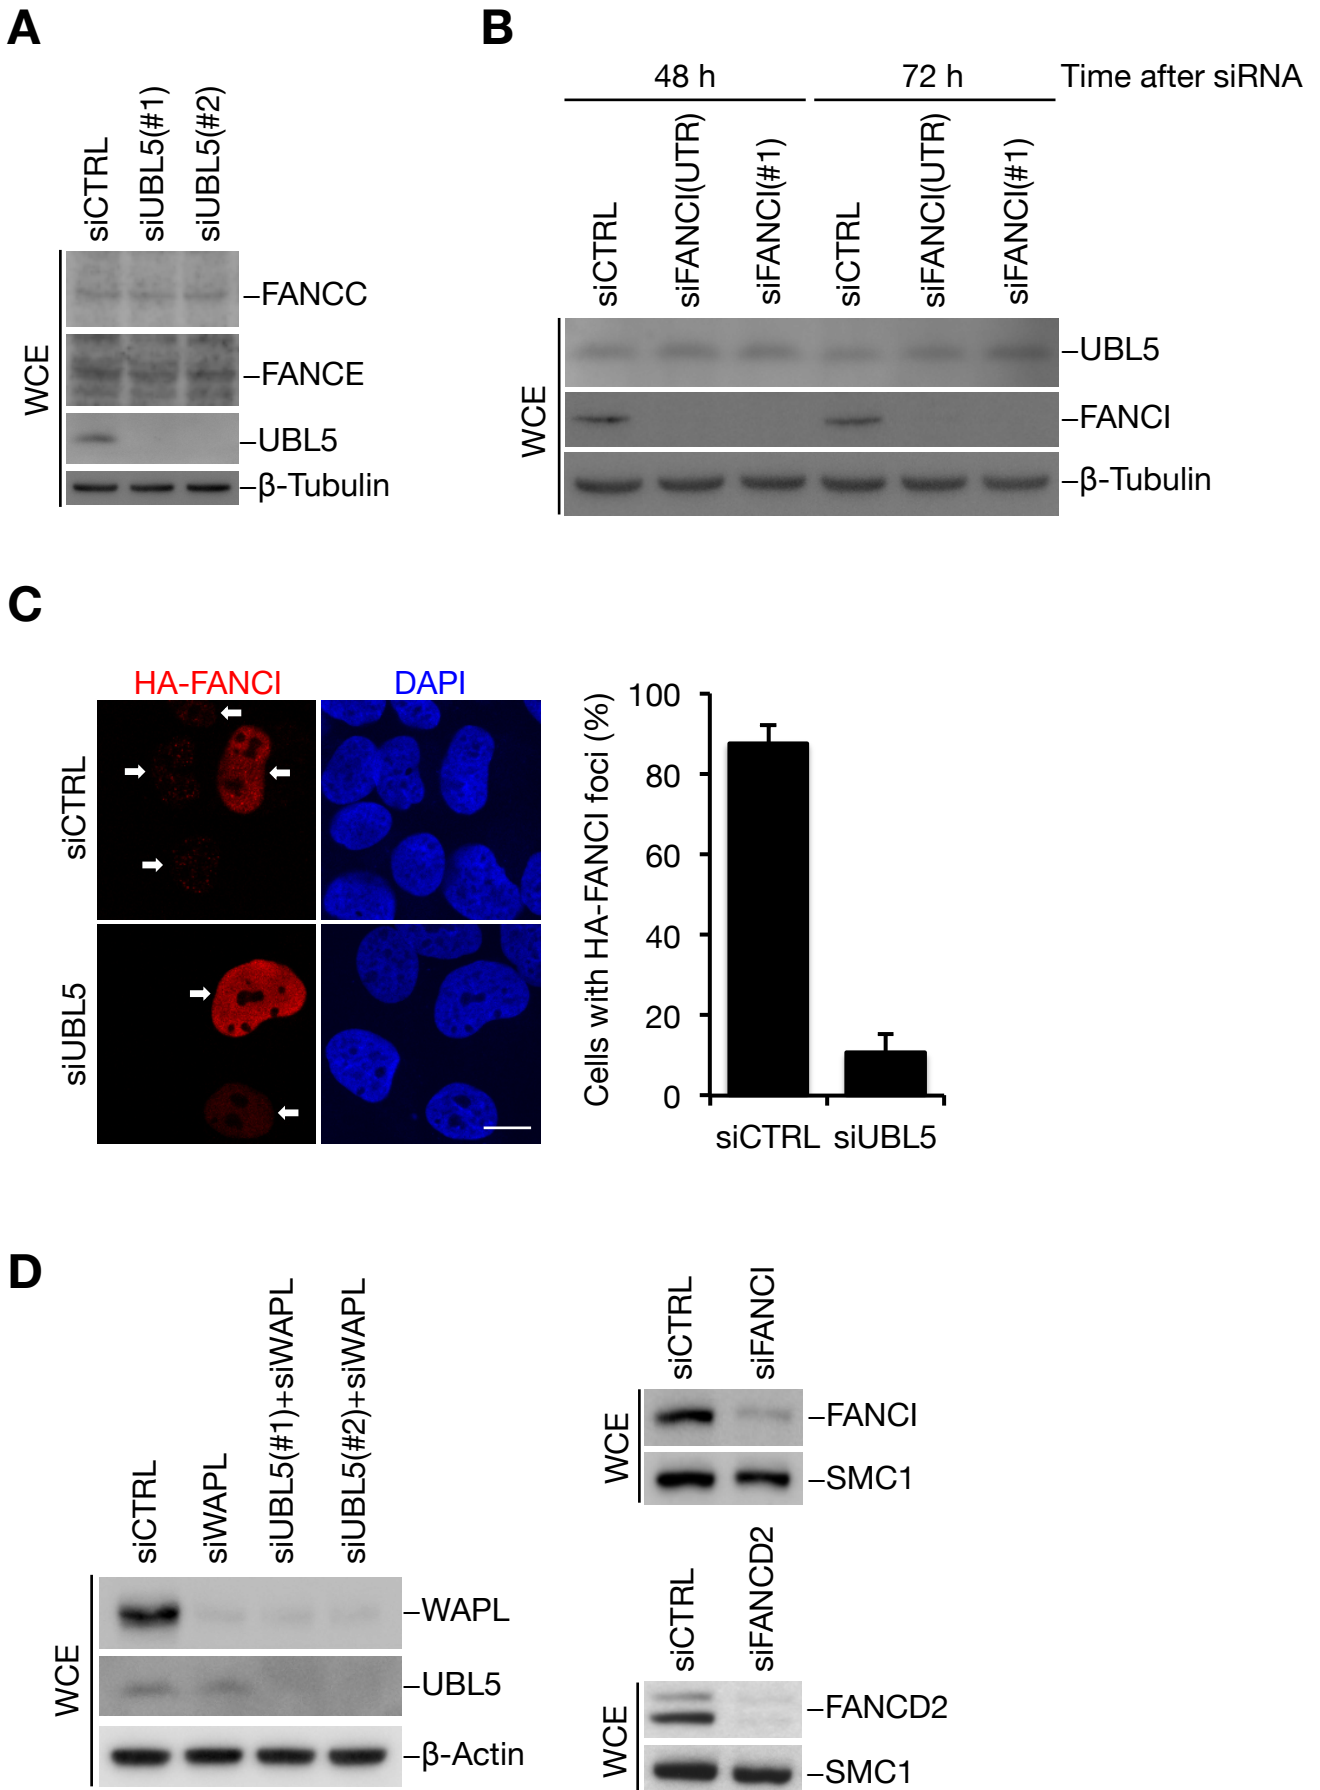

**Figure S3.**

**UBL5 has a direct role uncoupled from its pre-mRNA splicing involvement in promoting the FA pathway**

- A.** HeLa cells were transfected with non-targeting control (CTRL), UBL5 or SART1 siRNAs. Total mRNAs were extracted and levels of FANCI mRNA were measured by reverse transcription-qPCR, normalized to the expression of  $\beta$ -Actin.
- B.** U2OS cells stably expressing GFP-tagged FANCI and transfected with non-targeting control (CTRL) or UBL5 siRNAs were harvested following addition of MG132. Cell lysates were immunoblotted with GFP, UBL5 and  $\beta$ -Tubulin antibodies.
- C.** Whole cell extracts (WCE) of HeLa cells transfected with indicated Strep-HA-UBL5 constructs were subjected to Strep-Tactin pull-down followed by immunoblotting with FANCI and HA antibodies.
- D.** U2OS cells stably expressing siRNA-resistant (si<sup>R</sup>) forms of Strep-HA-UBL5 WT or D64A mutant were induced or not with doxycycline, transfected with non-targeting control (CTRL) or UBL5 siRNAs and treated with MMC for 24 h. Cell extracts were analyzed by immunoblotting with indicated antibodies.

**A**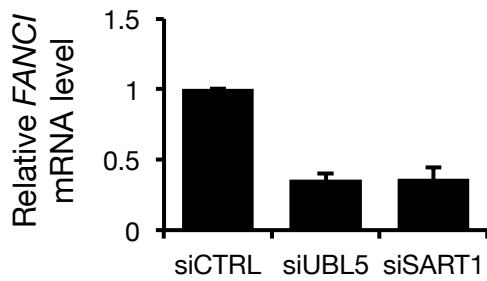**B**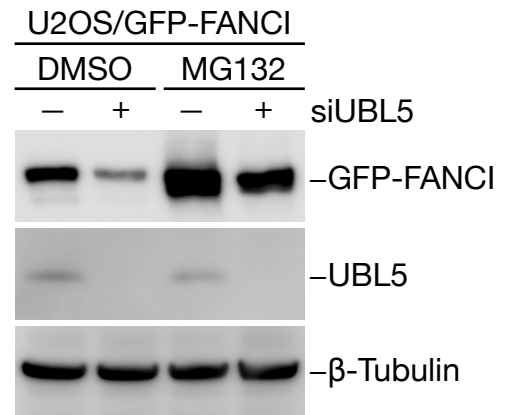**C**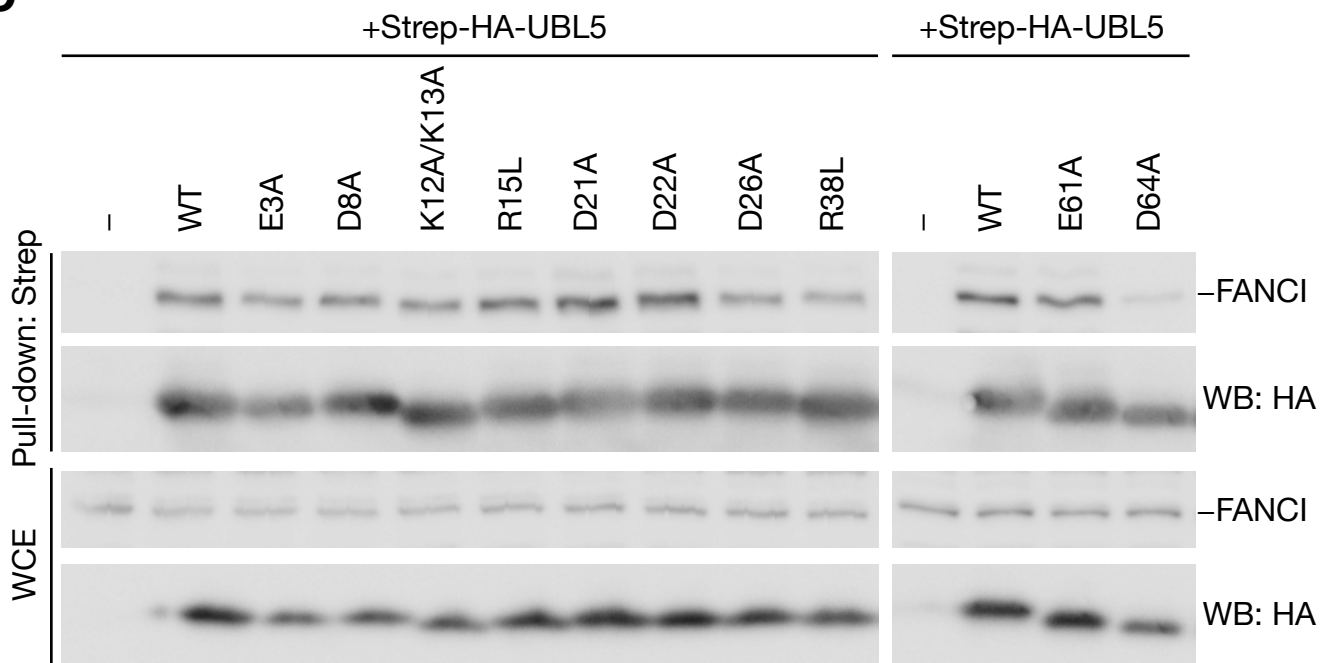**D**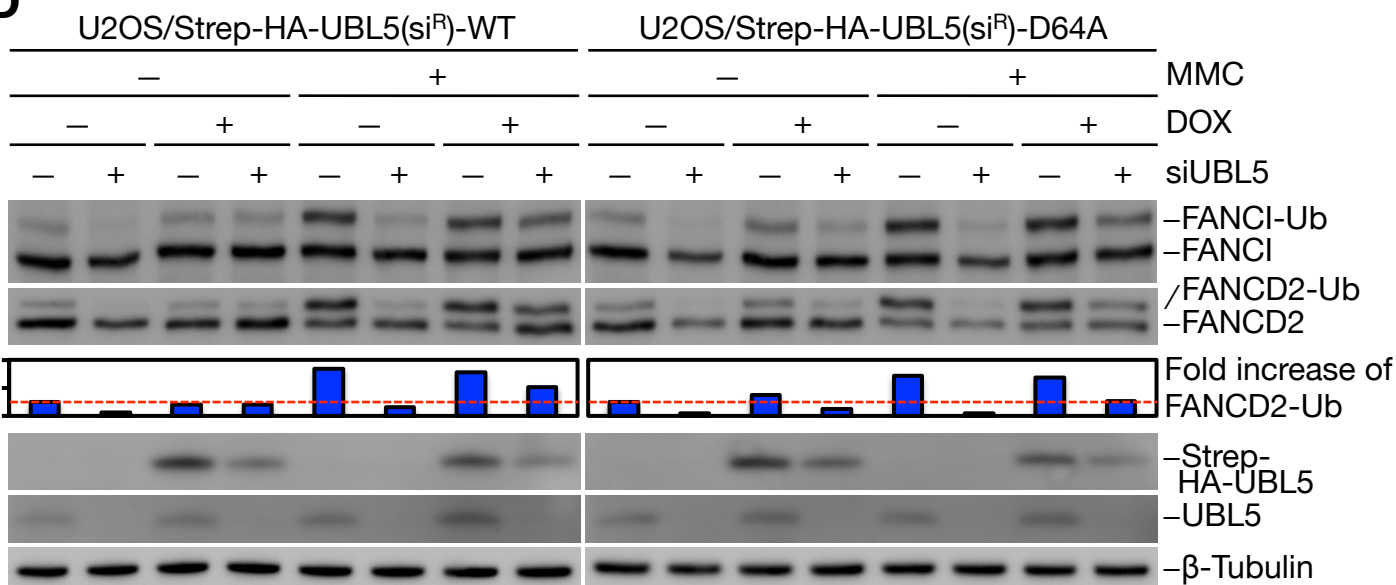

**Figure S4.**

**Binding of FANCI fragments to FANCD2**

Whole cell extracts (WCE) of HEK293T cells transfected with indicated constructs were subjected to GFP immunoprecipitation followed by immunoblotting with FANCD2 and GFP antibodies.

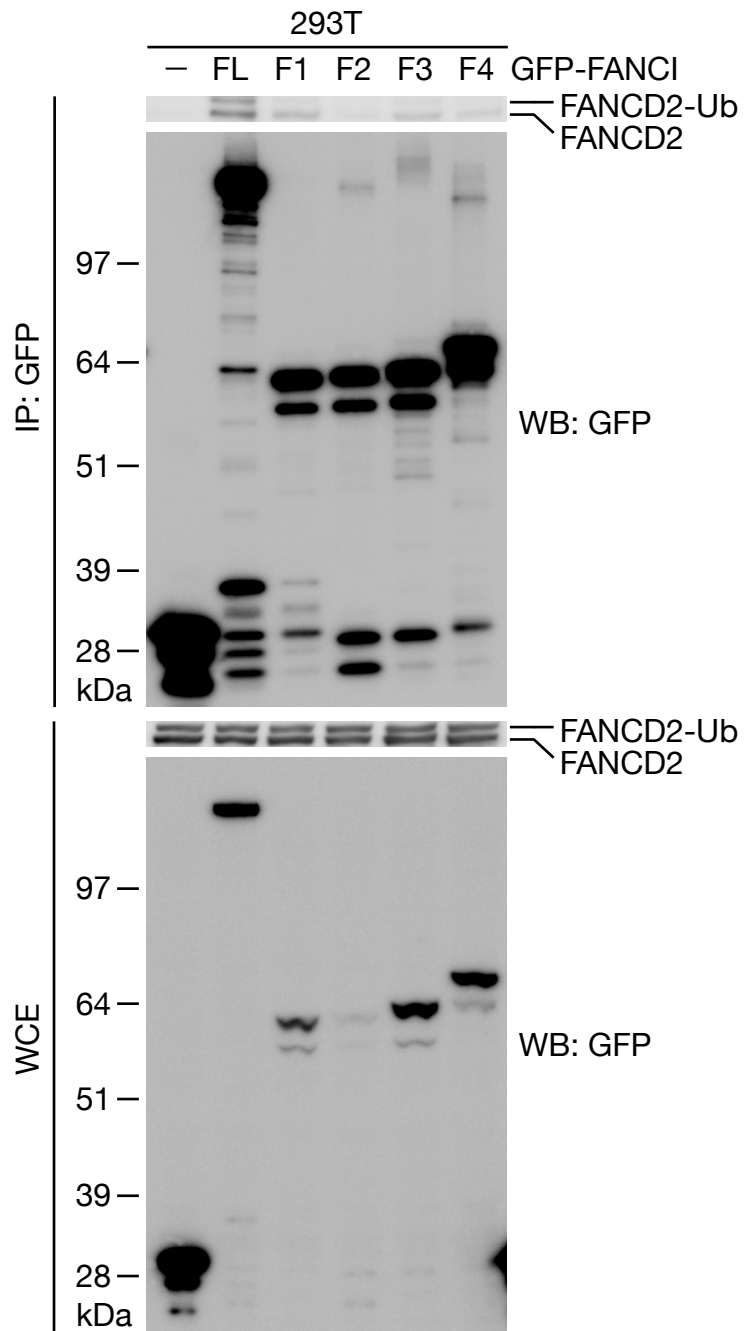



**Figure S5.**

**Loss of UBL5 binding impairs the stability and activation of FANCI, while FANCD2 knockdown does not affect FANCI stability.**

- A.** Extracts of HeLa cells transfected with non-targeting control (CTRL), FANCI or FANCD2 siRNAs for 48 or 72 h were analyzed by immunoblotting with antibodies to FANCI, FANCD2 or ORC2 (loading control).
- B.** HeLa cells transfected with non-targeting control or FANCD2 siRNA and subsequently transfected with GFP-tagged FANCI WT or  $\Delta$ UBL5 were treated with cycloheximide (CHX) for 3 h. Cell extracts were analyzed by immunoblotting with indicated antibodies.
- C.** U2OS cells stably expressing HA-tagged FANCI WT or  $\Delta$ UBL5 were treated or not with 30  $\mu$ M ML323 for 6 h. Cell extracts were analyzed by immunoblotting with HA and SMC1 antibodies.

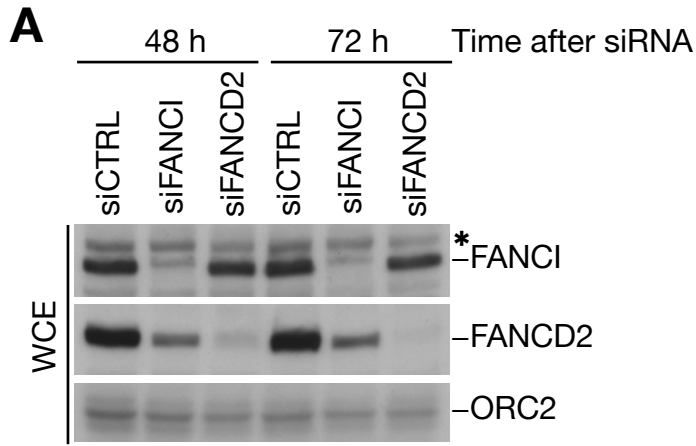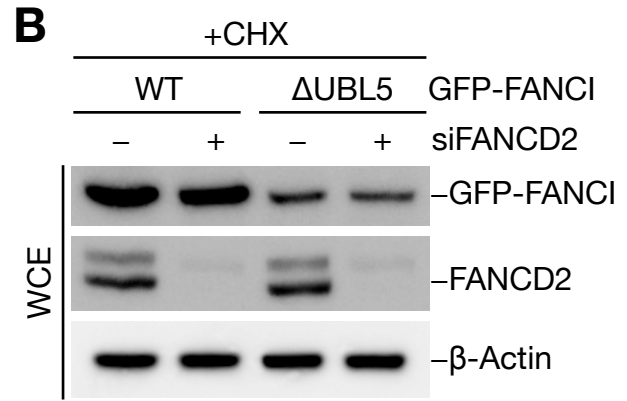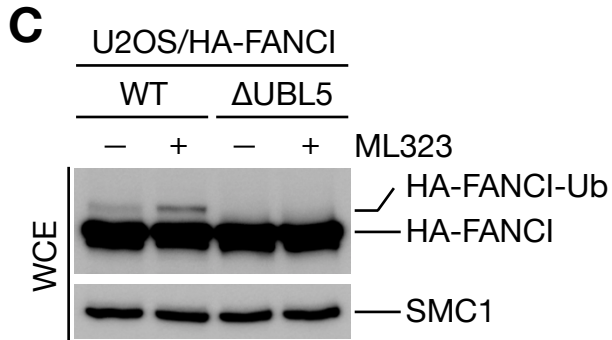

**Figure S6.**

**UBL5 promotes FANCI stability by facilitating its homodimerization**

- A.** Extracts of HEK293T cells co-transfected with GFP-FANCI and HA-FANCI constructs as indicated were subjected to HA immunoprecipitation followed by immunoblotting with GFP and HA antibodies.
- B.** Schematic diagram of enforced homodimerization of FANCI by means of the DmrB system.
- C.** HEK293T cells transfected with plasmids encoding DmrB-GFP-FANCI WT or  $\Delta$ UBL5 were treated with 100 nM AP20187 (B/B Homodimerizer) or left untreated, and then treated with cycloheximide (CHX). Cell extracts were analyzed by immunoblotting with GFP and  $\beta$ -Actin antibodies.

**A**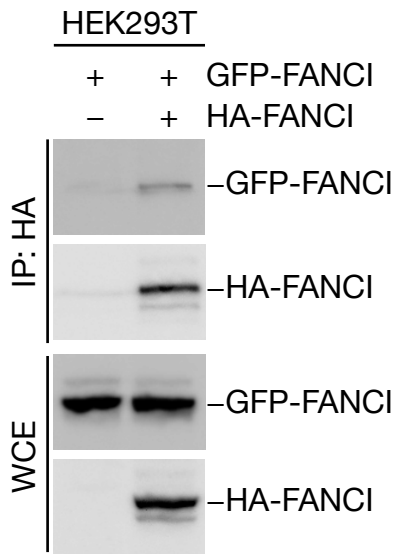**B**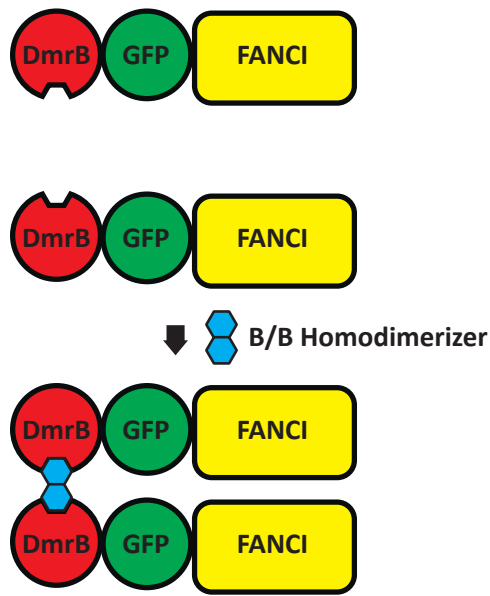**C**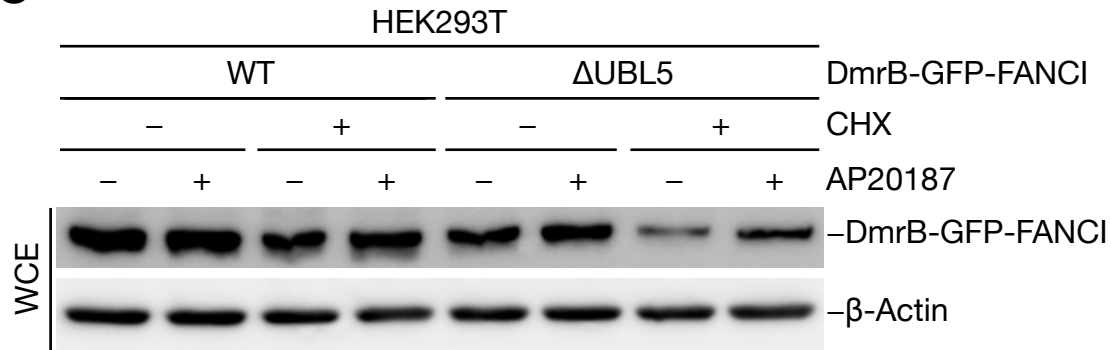

## **Supplementary reference**

1. Oka, Y. et al. UBL5 is essential for pre-mRNA splicing and sister chromatid cohesion in human cells. *EMBO Rep* 15, 956-64 (2014).
